# Supplementary material for: Seasonal Characteristics and Particle-size Distributions of Particulate Air Pollutants in Urumqi
Source: MDPI journal article supplement (doi:10.3390/ijerph16030396), 2019-01-31
Supplement: s1 [file s1]

Table S1 Categories of air based on air quality index (AQI) (Mintz, D. 2009).

| Range of AQI | Air quality conditions/color code     | Effect on health                                                                                                                                                                            | Suggestive measures                                                                                                                                                                       |
|--------------|---------------------------------------|---------------------------------------------------------------------------------------------------------------------------------------------------------------------------------------------|-------------------------------------------------------------------------------------------------------------------------------------------------------------------------------------------|
| 0-50         | Good/green                            | There are no health concerns, since the quality of air is good.                                                                                                                             | All kinds of people are allowed to take normal activities.                                                                                                                                |
| 51-100       | Moderate/yellow                       | Since the quality of air is moderate, there are no health concerns and it is considered to be safe for most people. There might be a weak effect on health of some highly sensitive people. | Such sensitive people should reduce outdoor activities.                                                                                                                                   |
| 101-150      | Unhealthy for sensitive groups/orange | Aggravation of symptoms of susceptible people who may be influenced on the heart and respiratory system.                                                                                    | Children, the elderly, and patients with heart disease and respiratory disease should reduce long-time and high-strength outdoor exercises.                                               |
| 151-200      | Unhealthy/red                         | Dramatic aggravation of symptoms of vulnerable groups who may be influenced on the heart and respiratory systems.                                                                           | Children, the elderly, and patients with heart disease and respiratory disease should avoid long-time and high-strength outdoor exercises; common people should reduce outdoor exercises. |
| 201-300      | Very unhealthy/purple                 | Aggravation of symptoms of people with heart attack and pulmonary disease who may have their exercise tolerance degraded; common healthy people may suffer from certain symptoms.           | Children, the elderly, and patients with heart disease and respiratory disease should stay indoors and avoid outdoor exercises; common people should reduce outdoor exercises.            |
| >300         | Hazardous/maroon                      | Healthy people have their exercise tolerance degraded, suffer obvious symptoms, and have some diseases breaking out in advance.                                                             | Children, the elderly, and patients should stay indoors and avoid physical consumption; common people avoid outdoor activities.                                                           |
